# Supplementary material
Source: publisher figshare collection journal article supplement (https://frontiersin.figshare.com/ndownloader/files/17199083)
Supplement: Supplementary file [file 17199083]

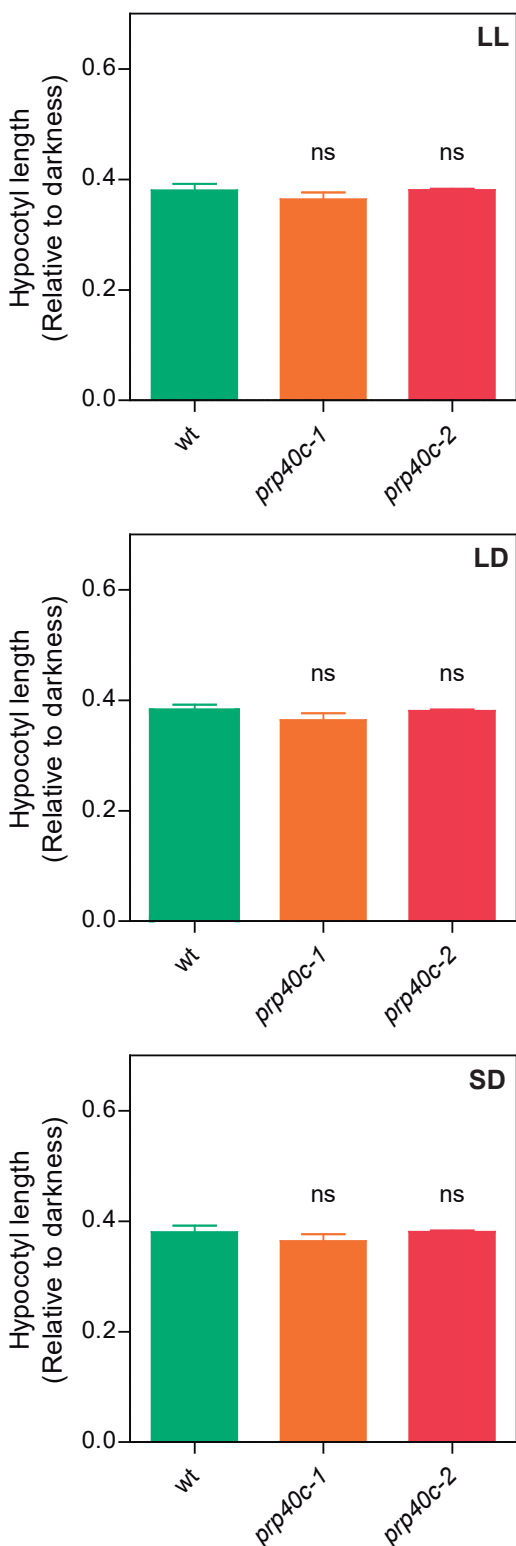

**Supplementary Figure S3.** Role of PRP40C in the control of photomorphogenesis. Hypocotyls of WT and *prp40c* mutants grown under different photoperiods; measurements are expressed relative to the dark control. Continuous white light (LL); Long-day photoperiod in white light (LD; 16 h light/8 h darkness); Short-day photoperiod in white light (SD; 8 h light/16 h darkness). Error bars indicate SEM. Student's t-Test was performed between mutants and wild-type (ns: not significant).
